# Supplementary material for: Impact of social isolation on mortality and morbidity in 20 high-income, middle-income and low-income countries in five continents
Source: PubMed Central journal article supplement — BMJ Glob Health. 2021 Mar 22;6(3):e004124. doi: 10.1136/bmjgh-2020-004124 (PMC7986654; doi:10.1136/bmjgh-2020-004124), 2021-03-22
Supplement: bmjgh-2020-004124supp002.pdf [file bmjgh-2020-004124supp002.pdf]

## **Supplemental figures legends**

### **Supplementary Figure 1. A flow chart of the study population**

Legend: The study sample was obtained from the PURE study dataset. Seven countries lacking follow-up information were excluded. China was excluded because relevant information on social isolation were not collected. Several individual sites\* were excluded. Participants aged <35 or >70 were excluded. Finally, participants not providing information on social isolation were excluded.

\*Sites from Argentina, Chile, Peru, and Poland participating in the PURE study at a later phase of the study

### **Supplementary Figure 2. Associations between social isolation and incident diseases stratified by county income levels**

Legend: The magnitude of disease risks associated with social isolation is greatest in the LICs except for incident myocardial infarction and COPD.

### **Supplementary Figure 3. Case fatality rates (95% CI) over 90 days from the occurrence of a new illness in those with and without social isolation**

Legend: The case fatality rate from stroke is higher in individuals with social isolation than those without while no significant differences are observed for those from the other illnesses.

MI=myocardial infarction. CVD=cardiovascular disease. COPD=chronic obstructive pulmonary disease.
