# Supplementary material for: Impact of social isolation on mortality and morbidity in 20 high-income, middle-income and low-income countries in five continents
Source: PubMed Central journal article supplement — BMJ Glob Health. 2021 Mar 22;6(3):e004124. doi: 10.1136/bmjgh-2020-004124 (PMC7986654; doi:10.1136/bmjgh-2020-004124), 2021-03-22

### Myocardial infarction

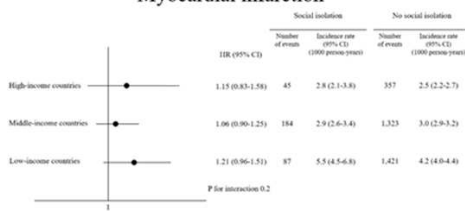

### Stroke

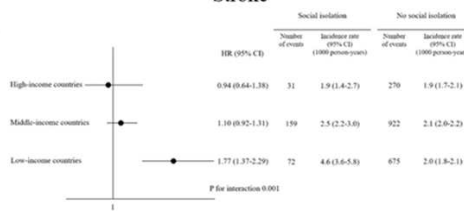

### Heart failure

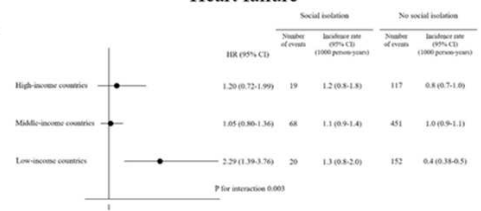

### Cardiovascular disease

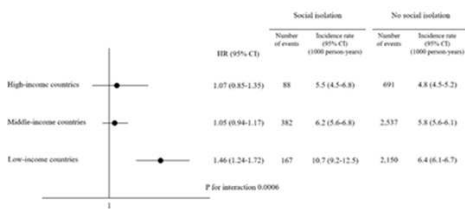

### Cancer

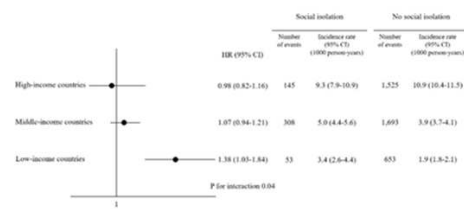

### Pneumonia

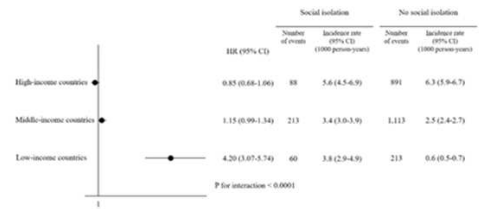

### COPD

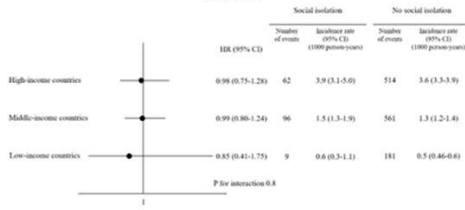

### Injury

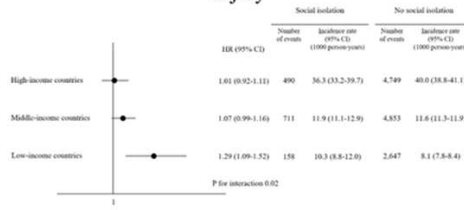

### Any disease or injury

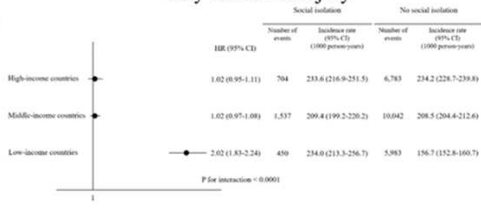

Supplement: bmjgh-2020-004124supp004.pdf [file bmjgh-2020-004124supp004.pdf]
